# Supplementary material for: Significant roles of Fe nanoparticles in mediating the thermal properties of polymers
Source: Royal Society of Chemistry journal article supplement (doi:10.1039/c1sm05920c), 2011-01-01

# Supporting Information

## Significant Roles of Fe Nanoparticles in Mediating Thermal Properties of Polymers

Fang Yun Du<sup>a</sup>, Le Xin Song<sup>\*a,b,c</sup>, Mang Wang<sup>b</sup>, Shu Zhen Pan<sup>b</sup>, Lin Hong Zhu<sup>b</sup> and Jing Yang<sup>b</sup>

<sup>a</sup> CAS Key Laboratory of Soft Matter Chemistry, Department of Polymer Science and Engineering, University of Science and Technology of China, Hefei 230026, P. R. China

<sup>b</sup> Department of Chemistry, University of Science and Technology of China, Hefei 230026, P. R. China

<sup>c</sup> State Key Laboratory of Coordination Chemistry, Nanjing University, Nanjing 210093, P. R. China

[solexin@ustc.edu.cn](mailto:solexin@ustc.edu.cn)

### A list of the contents for all the Supporting Information

| Page | Contents                                                                       |
|------|--------------------------------------------------------------------------------|
| 1    | A table of contents page.                                                      |
| 2    | XRD patterns of Fe nanoparticles.                                              |
| 3    | TEM image of Fe nanoparticles.                                                 |
| 4    | TG profiles of (a) free PEG and (b) Fe-PEG.                                    |
| 5    | TIC curve of free PPG.                                                         |
| 6    | Mass spectra of free PPG at (A) 10.25, (B) 17.40, (C) 25.77 and (D) 31.74 min. |
| 7    | TG profiles of (a) free PTFE and (b) Fe-PTFE.                                  |
| 8    | TIC curves of (A) free PTFE and (B) Fe-PTFE.                                   |
| 9    | Mass spectra of free PEG at (A) 32.1 and (B) 35.7 min.                         |

### XRD patterns of Fe nanoparticles.

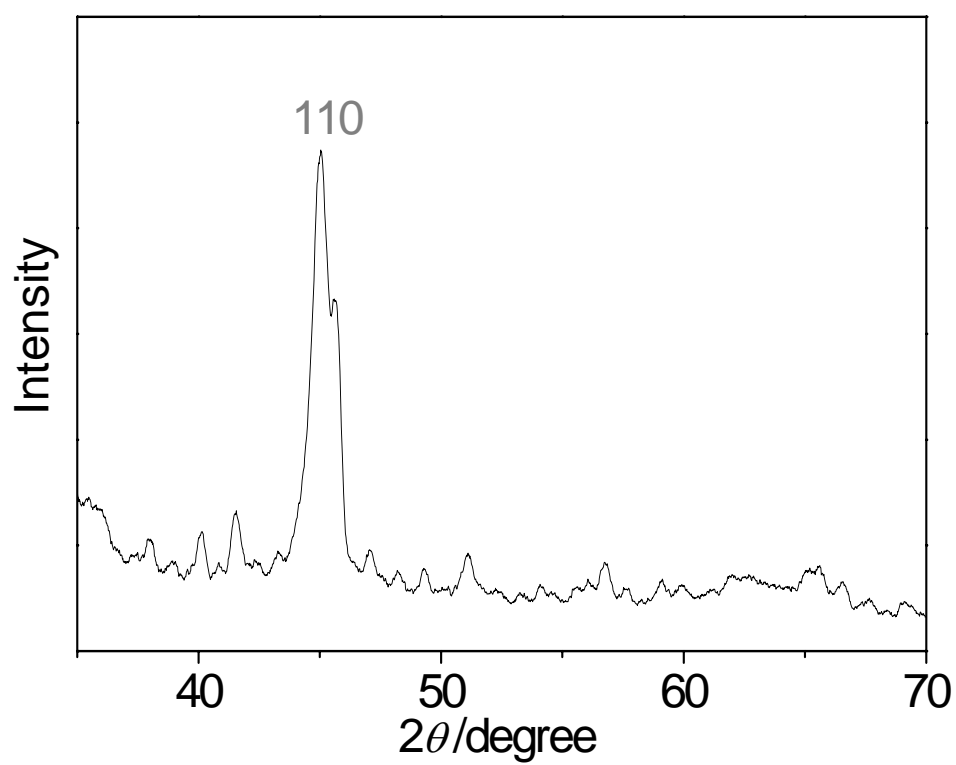

**TEM image of Fe nanoparticles.**

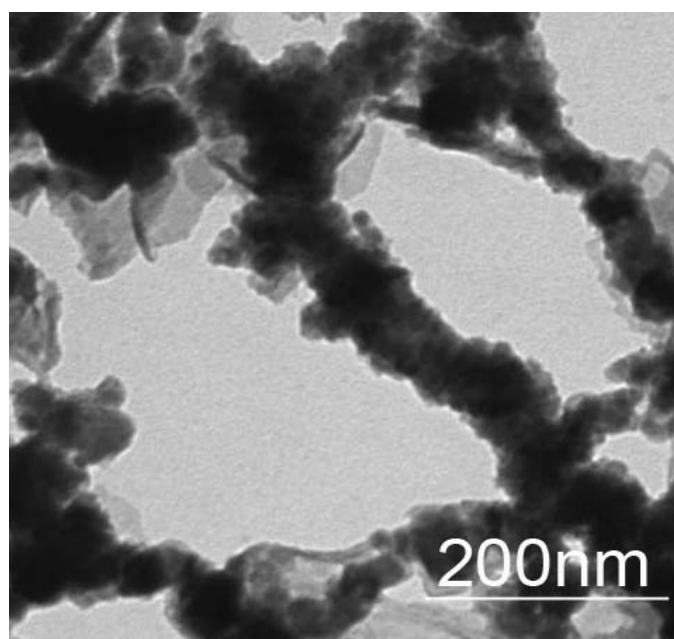

### TG profiles of (a) free PEG and (b) Fe-PEG.

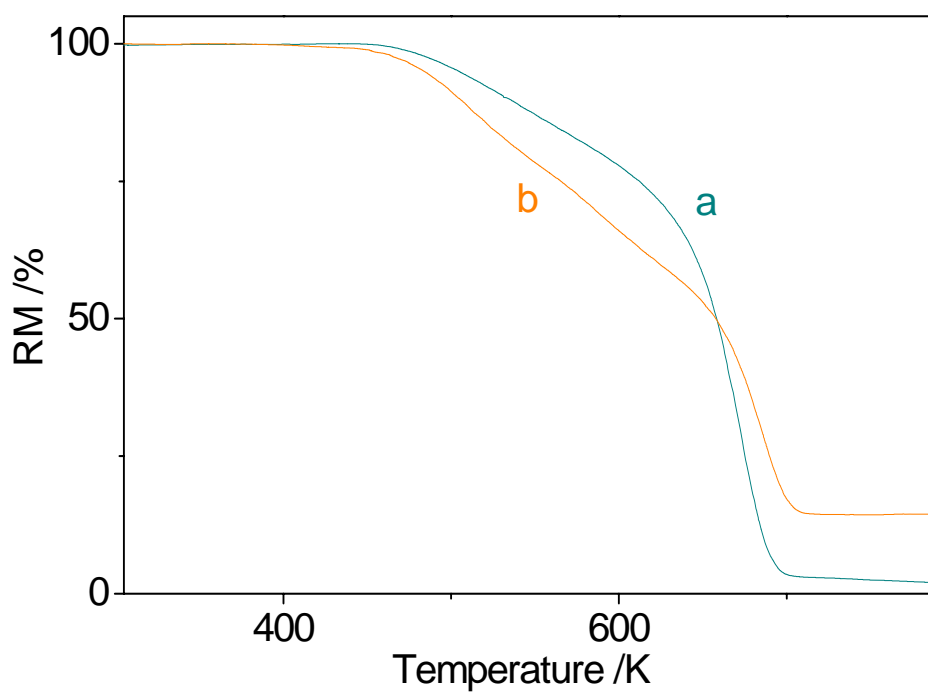

### TIC curve of free PPG.

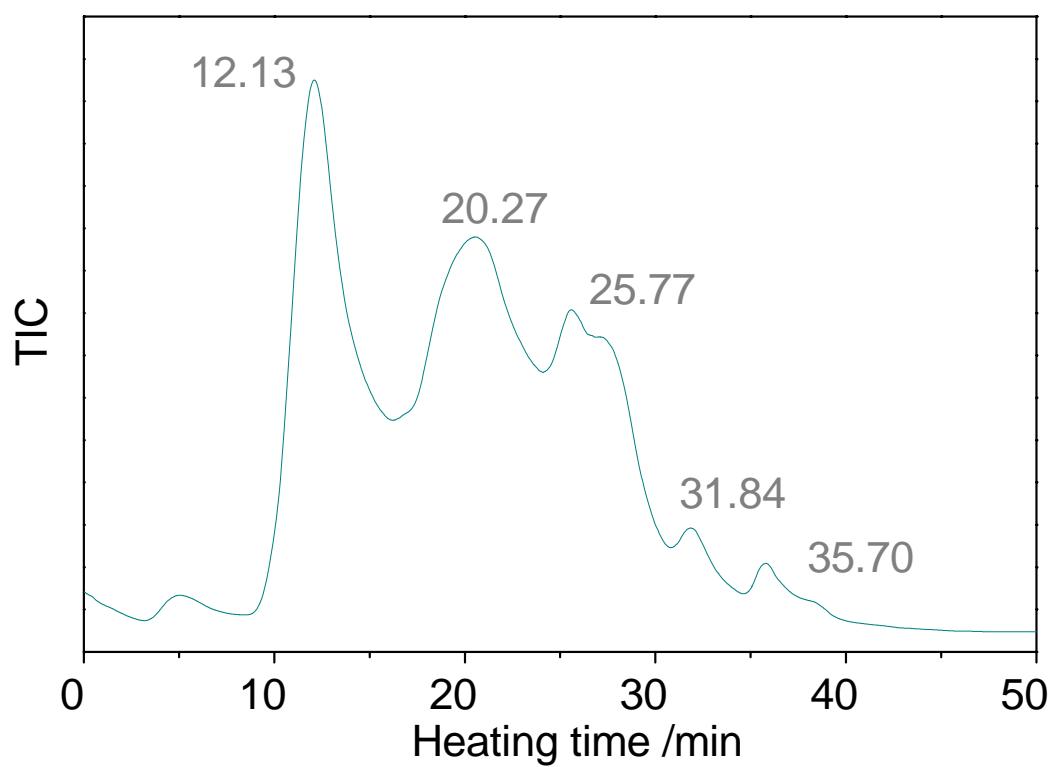

**Mass spectra of free PPG at (A) 10.25, (B) 17.40,  
(C) 25.77 and (D) 31.74 min.**

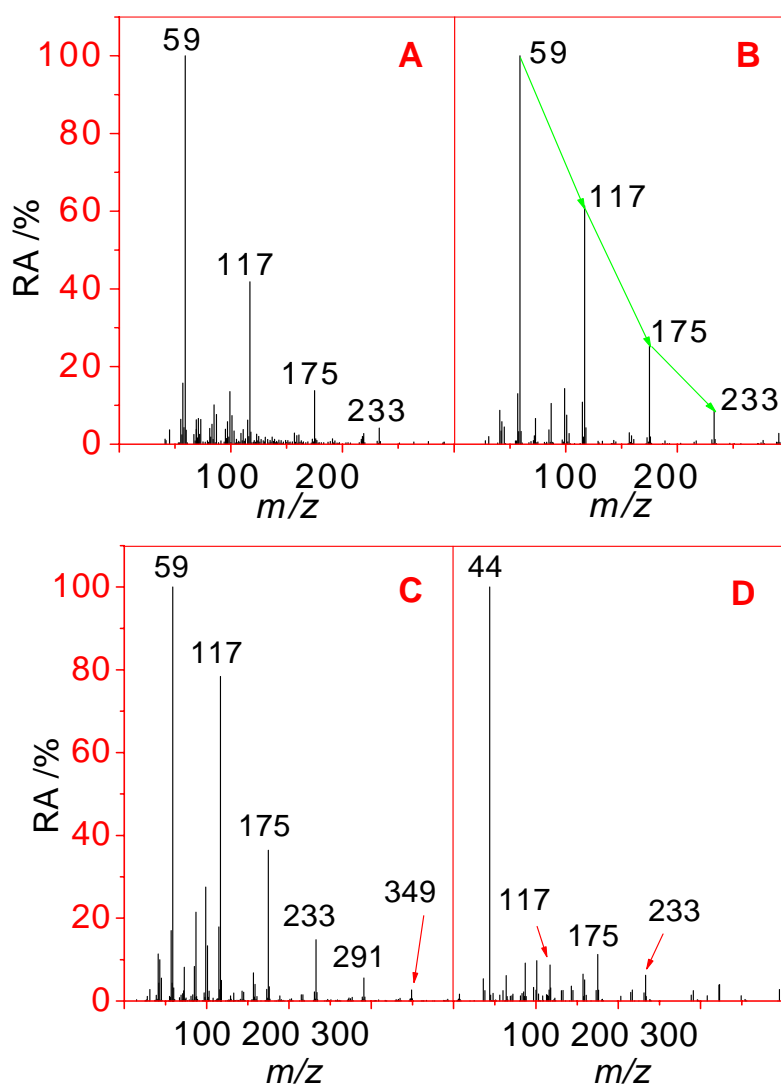

**TG profiles of (a) free PTFE and (b) Fe-PTFE.**

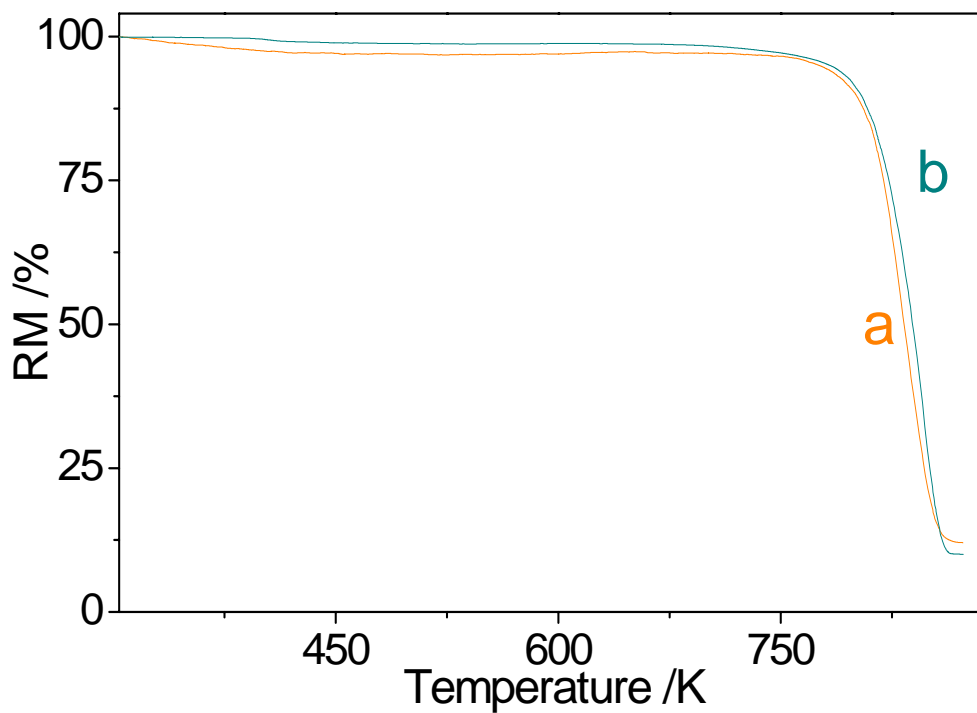

**TIC curves of (A) free PTFE and (B) Fe-PTFE.**

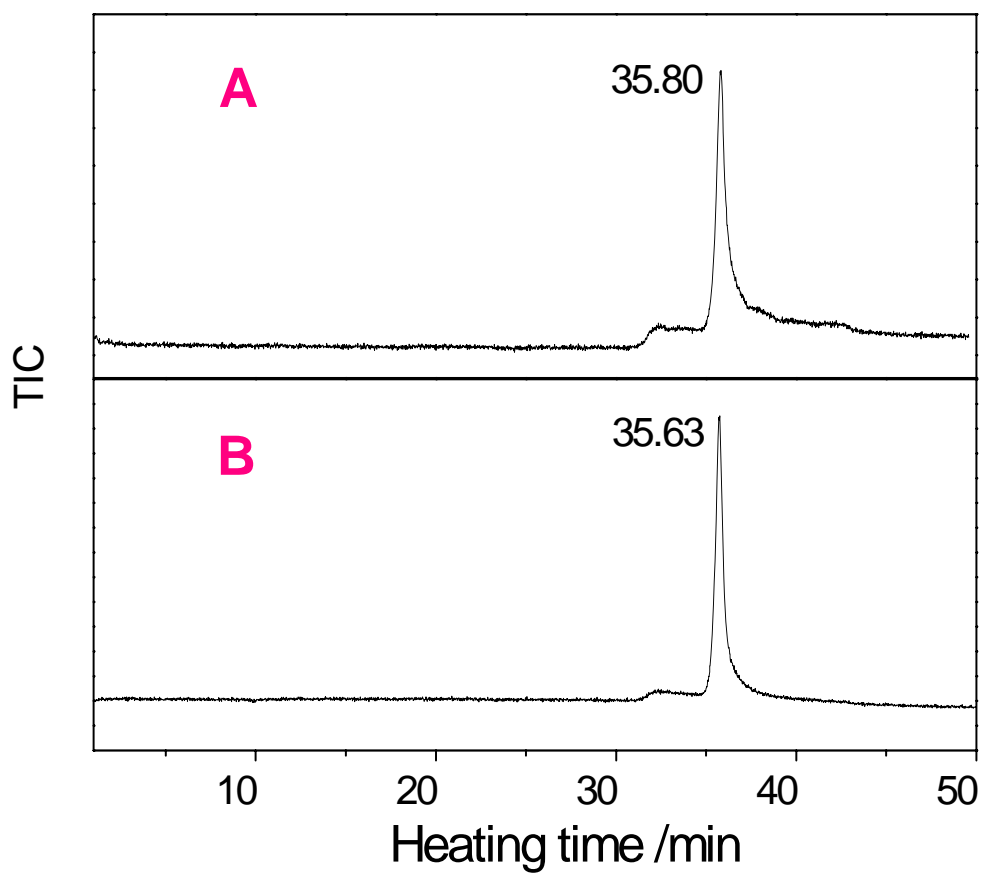



### Mass spectra of free PEG at (A) 32.1 and (B) 35.7 min.

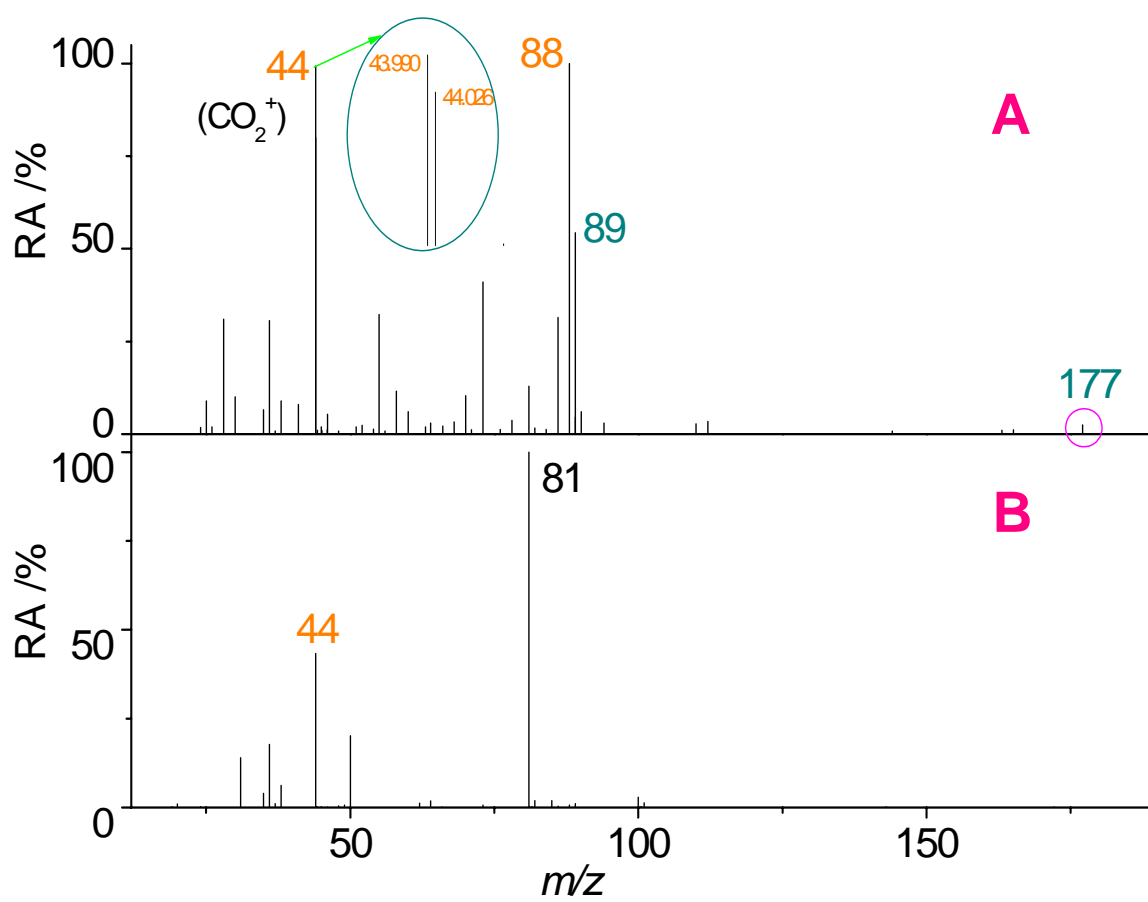

Supplement: c1sm05920c.pdf [file c1sm05920c.pdf]
